# Supplementary material for: Knowledge and application of sonographic scoring models for ovarian cancer management among gynecologists in Saudi Arabia: a cross-sectional study
Source: PeerJ. 2025 Jul 29;13:e19746. doi: 10.7717/peerj.19746 (PMC12315828; doi:10.7717/peerj.19746)
Supplement: Supplemental Information 1 [file peerj-13-19746-s001.xlsx]

## Sheet: Form Responses 1
Timestamp	1) Gender	2) What is the region in which you work?	3) What is your position	4) Experience in years	5) Type of current hospital:	6) How many patients you see in your gynaecology clinic per week?	7) I have received training in Gynaecology ultrasound scanning	8) If you are not the one scanning the patients, your ultrasound department have an experienced reliable sonographers	9) There are several different types of sonographic scoring models for diagnosing benign from malignant in adnexal masses	10) I am aware of the risk of malignancy index (RMI) to differentiate benign from malignant ovarian masses (I read about it and know how to calculate it)	11) I am aware of the newest model (ADNEX) developed by the IOTA group	12) The ADNEX model needs to be validated nationally before it can be used in clinical setting	13) I am always updated with the recent international guidelines for patient management with ovarian masses	14) Which of these factors were considered in decision making for surgery (please tick all boxes that apply) (patient examination, symptoms and history is outside the scope of this study)	15) Did you calculate the risk of malignancy index (RMI) for your patients, where [RMI= U x M x CA125]	16) If you answered No to previous question, indicate the reason please	17) If you answered Yes to question 15, which version of RMI was used:	18) Did the total score of RMI affect the decision for surgical intervention	19) Please explain the reason for your answer to previous question 18	20) Do you calculate ADNEX model for your patient	21) D0 you use other morphologic scoring system to diagnose ovarian masses?	22) Please specify the name of the scoring system you are using and the reason for using it	1) Gender	2) What is the region in which you work?	3) What is your position	4) Experience in years	5) Type of current hospital:	6) How many patients you see in your gynaecology clinic per week?	7) I have received training in Gynaecology ultrasound scanning	8) If you are not the one scanning the patients, your ultrasound department have an experienced reliable sonographers	9) There are several different types of sonographic scoring models for diagnosing benign from malignant in adnexal masses	10) I am aware of the risk of malignancy index (RMI) to differentiate benign from malignant ovarian masses (I read about it and know how to calculate it)	11) I am aware of the newest model (ADNEX) developed by the IOTA group	12) The ADNEX model needs to be validated nationally before it can be used in clinical setting	13) I am always updated with the recent international guidelines for patient management with ovarian masses	14) Which of these factors were considered in decision making for surgery (please tick all boxes that apply) (patient examination, symptoms and history is outside the scope of this study)	15) Did you calculate the risk of malignancy index (RMI) for your patients, where [RMI= U x M x CA125]	16) If you answered No to previous question, indicate the reason please	17) If you answered Yes to question 15, which version of RMI was used:	18) Did the total score of RMI affect the decision for surgical intervention	19) Please explain the reason for your answer to previous question 18	20) Do you calculate ADNEX model for your patient	21) D0 you use other morphologic scoring system to diagnose ovarian masses?	22) Please specify the name of the scoring system you are using and the reason for using it
2021-12-15 14:53:02	Female	Riyadh	Gynecology Consultant	More than 15 years	Teaching and Research Hospital	10-20	Agree	Agree	Agree	Neutral	Disagree	Neutral	Agree	Overall ultrasound morphology of the ovary, Ovarian diameter and size, Attention to any of the following specific features e.g. irregular wall, number of cysts, septation, solid areas, papillation or echogenecity, Presence of ascites, Results of tumor marker CA-125, Other tumor marker, Risk of malignancy index (RMI), ADNEX model, MRI magnetic resonance imaging	No			Not applicable		No	No
2021-12-15 15:28:02	Female	Riyadh	Gynecology Consultant	More than 15 years	Teaching and Research Hospital	10-20	Agree	Agree	Agree	Strongly agree	Agree	Agree	Neutral	Ovarian diameter and size, Attention to any of the following specific features e.g. irregular wall, number of cysts, septation, solid areas, papillation or echogenecity, Presence of abnormal morphology on both sides, Presence of ascites, Results of tumor marker CA-125, Risk of malignancy index (RMI), Patient wishes	Some of them		Not applicable	Some of them		Some of them	No
2021-12-19 17:46:15	Male	Riyadh	Gynecology Consultant	More than 15 years	Specialized hospital (tertiary)	31-40	Agree	Agree	Agree	Agree	Agree	Agree	Strongly agree	Attention to any of the following specific features e.g. irregular wall, number of cysts, septation, solid areas, papillation or echogenecity, Presence of abnormal morphology on both sides, Presence of doppler signal in abnormal area, Presence of ascites, Results of tumor marker CA-125	Yes		RMI I [U=0 if no abnormality detected, U=1 if one abnormality seen, and U=3 if >1 abnormality seen, for postmenopausal M=3]	Some of them	There other factors especially comorbidities and patient choice	No	No
2021-12-19 18:04:31	Female	Riyadh	Gynecology Consultant	More than 15 years	Specialized hospital (tertiary)	10-20	Agree	Strongly agree	Strongly agree	Agree	Neutral	Agree	Agree	Overall ultrasound morphology of the ovary, Ovarian diameter and size, Attention to any of the following specific features e.g. irregular wall, number of cysts, septation, solid areas, papillation or echogenecity, Presence of abnormal morphology on both sides, Presence of doppler signal in abnormal area, Presence of ascites, Results of tumor marker CA-125, Other tumor marker, Risk of malignancy i…	Yes		RMI I [U=0 if no abnormality detected, U=1 if one abnormality seen, and U=3 if >1 abnormality seen, for postmenopausal M=3]	Some of them		Some of them	Sometimes
2021-12-19 22:39:29	Female	Riyadh	Gynecology Consultant	More than 15 years	Specialized hospital (tertiary)	21-30	Agree	Strongly agree	Disagree	Disagree	Disagree	Neutral	Neutral	Overall ultrasound morphology of the ovary, Ovarian diameter and size, Attention to any of the following specific features e.g. irregular wall, number of cysts, septation, solid areas, papillation or echogenecity, Presence of ascites, Results of tumor marker CA-125, MRI magnetic resonance imaging, Other considerations: general medical health and suitability for surgery, Patient wishes	No	High suspicious lesions has to be removed		Some of them	It depends on the whole patient assesment	No	Sometimes	None
2021-12-19 23:41:51	Female	Riyadh	Gynecology Consultant	11-15 years	Specialized hospital (tertiary)	10-20	Neutral	Agree	Agree	Disagree	Disagree	Agree	Disagree	Ovarian diameter and size, Attention to any of the following specific features e.g. irregular wall, number of cysts, septation, solid areas, papillation or echogenecity, Presence of ascites, Results of tumor marker CA-125	No	Don’t know		Not applicable		No	Sometimes
2021-12-20 19:48:02	Female	Riyadh	Gynecology Consultant	6-10 years	Specialized hospital (tertiary)	21-30	Agree	Strongly agree	Agree	Strongly agree	Strongly agree	Agree	Strongly agree	Attention to any of the following specific features e.g. irregular wall, number of cysts, septation, solid areas, papillation or echogenecity, Presence of abnormal morphology on both sides, Presence of doppler signal in abnormal area, Presence of ascites, Results of tumor marker CA-125, Risk of malignancy index (RMI), ADNEX model, Other considerations: general medical health and suitability for s…	Yes		RMI I [U=0 if no abnormality detected, U=1 if one abnormality seen, and U=3 if >1 abnormality seen, for postmenopausal M=3]	Yes	More risk of malignancy	Some of them	Rarely	RMI
2021-12-21 19:56:07	Female	Riyadh	Specialist	11-15 years	Secondary hospital (150 beds or more)	10-20	Neutral	Agree	Agree	Agree	Neutral	Agree	Disagree	Ovarian diameter and size, Attention to any of the following specific features e.g. irregular wall, number of cysts, septation, solid areas, papillation or echogenecity, Presence of ascites, Results of tumor marker CA-125, CT computed tomography	No	Did not see patient with ovarian neoplasm in my practice as general gynecology		Not applicable	Didnt use it	No	No
2021-12-21 20:15:10	Female	Riyadh	Gynecology Consultant	6-10 years	Secondary hospital (150 beds or more)	21-30	Agree	Agree	Disagree	Agree	Disagree	Neutral	Strongly agree	Overall ultrasound morphology of the ovary, Ovarian diameter and size, Attention to any of the following specific features e.g. irregular wall, number of cysts, septation, solid areas, papillation or echogenecity, Presence of abnormal morphology on both sides, Presence of doppler signal in abnormal area, Presence of ascites, Results of tumor marker CA-125, Other tumor marker, Risk of malignancy i…	Some of them		RMI I [U=0 if no abnormality detected, U=1 if one abnormality seen, and U=3 if >1 abnormality seen, for postmenopausal M=3]	Yes	Because high index means high possibility to be malignant	No	No
2022-01-02 00:19:04	Female	Riyadh	Gynecology Consultant	More than 15 years	Teaching and Research Hospital	31-40	Disagree	Strongly disagree	Agree	Strongly agree	Strongly disagree	Not applicable	Strongly disagree	Overall ultrasound morphology of the ovary, Ovarian diameter and size, Attention to any of the following specific features e.g. irregular wall, number of cysts, septation, solid areas, papillation or echogenecity, Presence of abnormal morphology on both sides, Risk of malignancy index (RMI), Other considerations: general medical health and suitability for surgery, Patient wishes	No	I don't need it		Not applicable	Not needed	No	No	None
2022-01-02 06:13:52	Male	Riyadh	Gynecology Consultant	More than 15 years	Secondary hospital (150 beds or more)	21-30	Agree	Agree	Agree	Agree	Neutral	Agree	Neutral	Overall ultrasound morphology of the ovary, Ovarian diameter and size, Attention to any of the following specific features e.g. irregular wall, number of cysts, septation, solid areas, papillation or echogenecity, Presence of abnormal morphology on both sides, Presence of doppler signal in abnormal area, Results of tumor marker CA-125, Other tumor marker, Risk of malignancy index (RMI), Other con…	Yes		RMI I [U=0 if no abnormality detected, U=1 if one abnormality seen, and U=3 if >1 abnormality seen, for postmenopausal M=3]	Yes	And according to the score, refer to oncologist	No	No
2022-01-02 06:15:21	Female	Makkah	Gynecology Consultant	More than 15 years	Teaching and Research Hospital	31-40	Agree	Strongly agree	Strongly agree	Strongly agree	Disagree	Neutral	Agree	Overall ultrasound morphology of the ovary, Ovarian diameter and size, Attention to any of the following specific features e.g. irregular wall, number of cysts, septation, solid areas, papillation or echogenecity, Presence of abnormal morphology on both sides, Presence of doppler signal in abnormal area, Results of tumor marker CA-125, Other tumor marker, Risk of malignancy index (RMI), MRI magne…	Yes		RMI I [U=0 if no abnormality detected, U=1 if one abnormality seen, and U=3 if >1 abnormality seen, for postmenopausal M=3]	Yes	RMI score affect my decision to perform the surgery myself or refer her to Gyn Onc	No	No
2022-01-02 06:26:00	Male	Makkah	Gynecology Consultant	More than 15 years	Specialized hospital (tertiary)	10-20	Agree	Neutral	Agree	Strongly agree	Disagree	Strongly disagree	Strongly agree	Overall ultrasound morphology of the ovary, Ovarian diameter and size, Presence of doppler signal in abnormal area, Results of tumor marker CA-125, Risk of malignancy index (RMI)	Yes		RMI I [U=0 if no abnormality detected, U=1 if one abnormality seen, and U=3 if >1 abnormality seen, for postmenopausal M=3]	Yes	Effect of my training	No	No
2022-01-02 06:31:39	Female	Riyadh	Gynecology Consultant	More than 15 years	Secondary hospital (150 beds or more)	31-40	Disagree	Agree	Agree	Strongly agree	Neutral	Agree	Agree	Presence of doppler signal in abnormal area, Presence of ascites, Results of tumor marker CA-125, Risk of malignancy index (RMI), ADNEX model	Yes		Not applicable	Not applicable		Some of them	No
2022-01-02 07:04:39	Female	Makkah	Gynecology Consultant	2-5 years	Teaching and Research Hospital	10-20	Strongly agree	Strongly agree	Neutral	Strongly agree	Strongly disagree	Not applicable	Agree	Overall ultrasound morphology of the ovary, Attention to any of the following specific features e.g. irregular wall, number of cysts, septation, solid areas, papillation or echogenecity, Presence of ascites, Results of tumor marker CA-125, Other tumor marker, Risk of malignancy index (RMI), MRI magnetic resonance imaging, Other considerations: general medical health and suitability for surgery, P…	Yes		RMI I [U=0 if no abnormality detected, U=1 if one abnormality seen, and U=3 if >1 abnormality seen, for postmenopausal M=3]	Yes		No	No
2022-01-02 08:42:43	Female	Makkah	Gynecology Consultant	2-5 years	Specialized hospital (tertiary)	21-30	Neutral	Disagree	Agree	Agree	Strongly disagree	Agree	Disagree	Ovarian diameter and size, Attention to any of the following specific features e.g. irregular wall, number of cysts, septation, solid areas, papillation or echogenecity, Presence of ascites, Results of tumor marker CA-125, Risk of malignancy index (RMI), Other considerations: general medical health and suitability for surgery, Patient wishes	Yes		RMI I [U=0 if no abnormality detected, U=1 if one abnormality seen, and U=3 if >1 abnormality seen, for postmenopausal M=3]	Yes		No	No
2022-01-02 09:08:53	Female	Madinah	Gynecology Consultant	More than 15 years	Specialized hospital (tertiary)	31-40	Neutral	Agree	Strongly agree	Strongly agree	Neutral	Neutral	Agree	Overall ultrasound morphology of the ovary, Ovarian diameter and size, Attention to any of the following specific features e.g. irregular wall, number of cysts, septation, solid areas, papillation or echogenecity, Presence of abnormal morphology on both sides, Presence of doppler signal in abnormal area, Presence of ascites, Results of tumor marker CA-125, Other tumor marker, Risk of malignancy i…	Yes		RMI I [U=0 if no abnormality detected, U=1 if one abnormality seen, and U=3 if >1 abnormality seen, for postmenopausal M=3]	Yes	Higher levels than 200 indicate propability of malignancy	No	No
2022-01-02 12:00:57	Female	Riyadh	Specialist	More than 15 years	Secondary hospital (150 beds or more)	less than 10	Neutral	Agree	Agree	Strongly agree	Neutral	Agree	Agree	Overall ultrasound morphology of the ovary, Ovarian diameter and size, Attention to any of the following specific features e.g. irregular wall, number of cysts, septation, solid areas, papillation or echogenecity, Presence of abnormal morphology on both sides, Presence of doppler signal in abnormal area, Presence of ascites, Results of tumor marker CA-125, Other tumor marker, Risk of malignancy i…	Yes		RMI I [U=0 if no abnormality detected, U=1 if one abnormality seen, and U=3 if >1 abnormality seen, for postmenopausal M=3]	Some of them		No	Yes	RMI 1, ORAD
2022-01-02 15:51:17	Female	Riyadh	Gynecology Consultant	11-15 years	Teaching and Research Hospital	21-30	Agree	Agree	Strongly agree	Strongly agree	Disagree	Agree	Agree	Overall ultrasound morphology of the ovary, Ovarian diameter and size, Attention to any of the following specific features e.g. irregular wall, number of cysts, septation, solid areas, papillation or echogenecity, Presence of abnormal morphology on both sides, Presence of doppler signal in abnormal area, Presence of ascites, Results of tumor marker CA-125, Other tumor marker, Risk of malignancy i…	Yes		RMI I [U=0 if no abnormality detected, U=1 if one abnormality seen, and U=3 if >1 abnormality seen, for postmenopausal M=3]	Yes	Yes affecting specially in post menopausal pt.	No	No	Not using
2022-01-02 19:35:54	Female	Eastern Region	Gynecology Consultant	More than 15 years	Secondary hospital (150 beds or more)	10-20	Strongly agree	Agree	Agree	Agree	Disagree	Neutral	Neutral	Ovarian diameter and size, Attention to any of the following specific features e.g. irregular wall, number of cysts, septation, solid areas, papillation or echogenecity, Presence of ascites, Results of tumor marker CA-125, Other tumor marker, Risk of malignancy index (RMI), ADNEX model, MRI magnetic resonance imaging, CT computed tomography, Other considerations: general medical health and suitab…	No	Not much oriented to it	Not applicable	Not applicable	?	No	No
2022-01-02 20:29:14	Female	Eastern Region	Gynecology Consultant	11-15 years	Specialized hospital (tertiary)	10-20	Disagree	Strongly agree	Agree	Disagree	Strongly disagree	Neutral	Agree	Overall ultrasound morphology of the ovary, Ovarian diameter and size, Attention to any of the following specific features e.g. irregular wall, number of cysts, septation, solid areas, papillation or echogenecity, Presence of abnormal morphology on both sides, Presence of doppler signal in abnormal area, Presence of ascites, Results of tumor marker CA-125, Other tumor marker, Other considerations…	No	Lack of knowledge	Not applicable	Not applicable	Not used	No	No	NA
2022-01-03 21:28:04	Female	Riyadh	Gynecology Consultant	More than 15 years	Specialized hospital (tertiary)	21-30	Agree	Agree	Agree	Agree	Neutral	Neutral	Agree	Overall ultrasound morphology of the ovary, Ovarian diameter and size, Attention to any of the following specific features e.g. irregular wall, number of cysts, septation, solid areas, papillation or echogenecity, Presence of abnormal morphology on both sides, Presence of doppler signal in abnormal area, Presence of ascites, Results of tumor marker CA-125, Other tumor marker, Risk of malignancy i…	Some of them		RMI I [U=0 if no abnormality detected, U=1 if one abnormality seen, and U=3 if >1 abnormality seen, for postmenopausal M=3]	Some of them	Not all masses are malignant , and some patients have medical diseases can’t operate on them as well as some need to be referred to ongologist	Some of them	Sometimes
2022-01-05 22:02:16	Female	Riyadh	Gynecology Consultant	More than 15 years	Teaching and Research Hospital	31-40	Agree	Strongly agree	Agree	Agree	Agree	Agree	Agree	Overall ultrasound morphology of the ovary, Attention to any of the following specific features e.g. irregular wall, number of cysts, septation, solid areas, papillation or echogenecity, Presence of abnormal morphology on both sides, Presence of ascites, Results of tumor marker CA-125, Risk of malignancy index (RMI), ADNEX model, MRI magnetic resonance imaging, CT computed tomography, Other consi…	Some of them			Some of them	RMI 2 use with ultrasound findings can be a useful and applicable method for initial assessment of patients with pelvic masses.	Some of them	No	The HE4
2022-01-15 21:16:42	Female	Riyadh	Specialist	More than 15 years	Specialized hospital (tertiary)	31-40	Strongly agree	Strongly agree	Agree	Agree	Disagree	Agree	Agree	Attention to any of the following specific features e.g. irregular wall, number of cysts, septation, solid areas, papillation or echogenecity, Presence of abnormal morphology on both sides, Presence of doppler signal in abnormal area, Presence of ascites, Results of tumor marker CA-125, Other tumor marker, Risk of malignancy index (RMI), ADNEX model, MRI magnetic resonance imaging, CT computed to…	No	Not involved in this cases		Not applicable		No	No
2022-01-17 16:06:21	Female	Riyadh	Gynecology Consultant	More than 15 years	Teaching and Research Hospital	21-30	Agree	Strongly agree	Strongly agree	Disagree	Disagree	Agree	Agree	Overall ultrasound morphology of the ovary, Attention to any of the following specific features e.g. irregular wall, number of cysts, septation, solid areas, papillation or echogenecity, Presence of abnormal morphology on both sides, Presence of doppler signal in abnormal area, Presence of ascites, Results of tumor marker CA-125, Other tumor marker, MRI magnetic resonance imaging, CT computed tom…	No	I don’t know		Not applicable		No	No	No
2022-01-17 19:10:38	Female	Riyadh	Gynecology Consultant	More than 15 years	Secondary hospital (150 beds or more)	31-40	Agree	Strongly agree	Agree	Strongly agree	Disagree	Disagree	Agree	Presence of ascites, Results of tumor marker CA-125, Risk of malignancy index (RMI), Other considerations: general medical health and suitability for surgery, Patient wishes	Yes		RMI I [U=0 if no abnormality detected, U=1 if one abnormality seen, and U=3 if >1 abnormality seen, for postmenopausal M=3]	Yes		No	No
2022-01-17 19:25:28	Female	Riyadh	Gynecology Consultant	11-15 years	Specialized hospital (tertiary)	31-40	Agree	Neutral	Strongly agree	Agree	Neutral	Agree	Neutral	Overall ultrasound morphology of the ovary, Ovarian diameter and size, Attention to any of the following specific features e.g. irregular wall, number of cysts, septation, solid areas, papillation or echogenecity, Presence of abnormal morphology on both sides, Presence of doppler signal in abnormal area, Presence of ascites, Results of tumor marker CA-125, MRI magnetic resonance imaging, Other co…	Some of them		RMI II [U=1 if no or 1 abnormality seen, U=4 if >2 abnormality detected, for postmenopausal M=4]	Some of them		No	No
2022-01-17 19:37:28	Female	Riyadh	Specialist	6-10 years	Specialized hospital (tertiary)	10-20	Disagree	Agree	Agree	Agree	Neutral	Neutral	Neutral	Overall ultrasound morphology of the ovary, Attention to any of the following specific features e.g. irregular wall, number of cysts, septation, solid areas, papillation or echogenecity, Presence of abnormal morphology on both sides, Presence of doppler signal in abnormal area, Presence of ascites, Results of tumor marker CA-125, Risk of malignancy index (RMI), ADNEX model, MRI magnetic resonance…	Yes		RMI II [U=1 if no or 1 abnormality seen, U=4 if >2 abnormality detected, for postmenopausal M=4]	Some of them		No	Yes
2022-01-17 19:38:40	Female	Riyadh	Gynecology Consultant	11-15 years	Specialized hospital (tertiary)	10-20	Neutral	Agree	Agree	Agree	Neutral	Agree	Agree	Overall ultrasound morphology of the ovary, Ovarian diameter and size, Attention to any of the following specific features e.g. irregular wall, number of cysts, septation, solid areas, papillation or echogenecity, Presence of abnormal morphology on both sides, Presence of doppler signal in abnormal area, Presence of ascites, Results of tumor marker CA-125, Other tumor marker, Risk of malignancy i…	Yes		RMI II [U=1 if no or 1 abnormality seen, U=4 if >2 abnormality detected, for postmenopausal M=4]	Yes		No	No
2022-01-17 19:43:42	Female	Riyadh	Gynecology Consultant	More than 15 years	Specialized hospital (tertiary)	21-30	Strongly agree	Strongly agree	Strongly agree	Agree	Neutral	Agree	Strongly agree	Overall ultrasound morphology of the ovary, Ovarian diameter and size, Attention to any of the following specific features e.g. irregular wall, number of cysts, septation, solid areas, papillation or echogenecity, Presence of ascites, Results of tumor marker CA-125, Risk of malignancy index (RMI), MRI magnetic resonance imaging, Patient wishes	Yes			Some of them		Some of them	Sometimes
2022-01-17 20:40:18	Female	Makkah	Gynecology Consultant	More than 15 years	Specialized hospital (tertiary)	31-40	Agree	Strongly agree	Neutral	Agree	Disagree	Neutral	Agree	Overall ultrasound morphology of the ovary, Ovarian diameter and size, Attention to any of the following specific features e.g. irregular wall, number of cysts, septation, solid areas, papillation or echogenecity, Presence of abnormal morphology on both sides, Presence of ascites, Results of tumor marker CA-125, MRI magnetic resonance imaging	No			No		No	Yes
2022-01-17 20:43:16	Female	Makkah	Gynecology Consultant	6-10 years	Specialized hospital (tertiary)	31-40	Agree	Disagree	Strongly agree	Strongly agree	Disagree	Neutral	Neutral	Ovarian diameter and size, Attention to any of the following specific features e.g. irregular wall, number of cysts, septation, solid areas, papillation or echogenecity, Risk of malignancy index (RMI)	Yes		RMI I [U=0 if no abnormality detected, U=1 if one abnormality seen, and U=3 if >1 abnormality seen, for postmenopausal M=3]	Yes		No	No
2022-01-17 20:44:17	Female	Jazan	Specialist	More than 15 years	Teaching and Research Hospital	less than 10	Strongly agree	Strongly agree	Strongly agree	Strongly agree	Strongly agree	Strongly agree	Strongly agree	Ovarian diameter and size, Attention to any of the following specific features e.g. irregular wall, number of cysts, septation, solid areas, papillation or echogenecity, Presence of abnormal morphology on both sides, Presence of doppler signal in abnormal area, Presence of ascites, Results of tumor marker CA-125, Risk of malignancy index (RMI)	Yes		RMI I [U=0 if no abnormality detected, U=1 if one abnormality seen, and U=3 if >1 abnormality seen, for postmenopausal M=3]	Yes	If all criteria fulfilled it indicate malignancy	No	No	No
2022-01-17 21:12:42	Female	Jazan	Specialist	11-15 years	Teaching and Research Hospital	less than 10	Neutral	Disagree	Strongly agree	Strongly agree	Strongly agree	Agree	Strongly agree	Ovarian diameter and size, Attention to any of the following specific features e.g. irregular wall, number of cysts, septation, solid areas, papillation or echogenecity, Presence of abnormal morphology on both sides, Presence of doppler signal in abnormal area, Presence of ascites, Results of tumor marker CA-125, Risk of malignancy index (RMI), ADNEX model, Patient wishes	Yes		RMI I [U=0 if no abnormality detected, U=1 if one abnormality seen, and U=3 if >1 abnormality seen, for postmenopausal M=3]	Yes	If the RMI score is high it is better to refer patients to higher oncology centre	Some of them	No	No
2022-01-17 21:40:52	Female	Makkah	Gynecology Consultant	More than 15 years	Secondary hospital (150 beds or more)	21-30	Agree	Neutral	Agree	Strongly agree	Strongly agree	Agree	Strongly agree	Presence of abnormal morphology on both sides, Presence of doppler signal in abnormal area, Presence of ascites, Other tumor marker, ADNEX model	Some of them		Not applicable			Some of them	No
2022-01-18 00:27:48	Male	Makkah	Gynecology Consultant	11-15 years	Specialized hospital (tertiary)	21-30	Neutral	Strongly agree	Strongly agree	Strongly agree	Neutral	Neutral	Neutral	Presence of ascites, Results of tumor marker CA-125, Other tumor marker, Risk of malignancy index (RMI), MRI magnetic resonance imaging	Some of them		Not applicable	Yes	If RMI is high you need to operate	No	No	RMI
2022-01-19 14:02:20	Female	Makkah	Gynecology Consultant	11-15 years	Specialized hospital (tertiary)	21-30	Neutral	Strongly agree	Strongly agree	Disagree	Disagree	Neutral	Neutral	Results of tumor marker CA-125	No			Some of them		No	No
2022-01-19 14:11:41	Female	Makkah	Gynecology Consultant	6-10 years	Teaching and Research Hospital	10-20	Strongly agree	Agree	Agree	Agree	Neutral	Agree	Neutral	Attention to any of the following specific features e.g. irregular wall, number of cysts, septation, solid areas, papillation or echogenecity, Presence of doppler signal in abnormal area, Presence of ascites, Results of tumor marker CA-125, Other tumor marker, Risk of malignancy index (RMI), ADNEX model, MRI magnetic resonance imaging, CT computed tomography	No			Some of them		No	Yes
2022-01-19 15:02:11	Female	Makkah	Gynecology Consultant	More than 15 years	Secondary hospital (150 beds or more)	31-40	Agree	Strongly agree	Strongly agree	Disagree	Neutral	Disagree	Strongly agree	Ovarian diameter and size, Risk of malignancy index (RMI), MRI magnetic resonance imaging, Other considerations: general medical health and suitability for surgery	Some of them			No		No	Sometimes
2022-01-19 15:50:04	Female	Riyadh	Gynecology Consultant	More than 15 years	Specialized hospital (tertiary)	10-20	Agree	Strongly agree	Neutral	Neutral	Neutral	Agree	Neutral	Ovarian diameter and size, Attention to any of the following specific features e.g. irregular wall, number of cysts, septation, solid areas, papillation or echogenecity, Presence of abnormal morphology on both sides, Presence of doppler signal in abnormal area, Presence of ascites, Results of tumor marker CA-125, Other tumor marker, Risk of malignancy index (RMI), MRI magnetic resonance imaging	Some of them			Some of them	Yes sometimes	No	No
2022-01-19 16:02:55	Female	Makkah	Gynecology Consultant	More than 15 years	Secondary hospital (150 beds or more)	10-20	Disagree	Agree	Agree	Disagree	Disagree	Neutral	Agree	Overall ultrasound morphology of the ovary, Attention to any of the following specific features e.g. irregular wall, number of cysts, septation, solid areas, papillation or echogenecity, Presence of abnormal morphology on both sides, Presence of doppler signal in abnormal area, Presence of ascites, Results of tumor marker CA-125, Other tumor marker, Other considerations: general medical health an…	No	I don’t know it	Not applicable	Not applicable		No	No
2022-01-19 16:24:20	Female	Madinah	Gynecology Consultant	More than 15 years	Secondary hospital (150 beds or more)	21-30	Disagree	Disagree	Neutral	Neutral	Disagree	Not applicable	Neutral	Attention to any of the following specific features e.g. irregular wall, number of cysts, septation, solid areas, papillation or echogenecity, Presence of abnormal morphology on both sides, Presence of ascites, Results of tumor marker CA-125, Other tumor marker, Risk of malignancy index (RMI), ADNEX model, MRI magnetic resonance imaging, Other considerations: general medical health and suitabilit…	No	Not used to do it		Some of them	Usually if we have high CA125 with ovarian mass we referred pt to tertiary center	No	Rarely
2022-01-19 16:27:00	Female	Madinah	Specialist	More than 15 years	Specialized hospital (tertiary)	31-40	Strongly agree	Strongly agree	Strongly agree	Strongly agree	Disagree	Neutral	Agree	Overall ultrasound morphology of the ovary, Ovarian diameter and size, Attention to any of the following specific features e.g. irregular wall, number of cysts, septation, solid areas, papillation or echogenecity, Presence of abnormal morphology on both sides, Presence of doppler signal in abnormal area, Presence of ascites, Results of tumor marker CA-125, Other tumor marker, Risk of malignancy i…	Yes		RMI I [U=0 if no abnormality detected, U=1 if one abnormality seen, and U=3 if >1 abnormality seen, for postmenopausal M=3]	Yes		No	No
2022-01-19 17:07:40	Female	Madinah	Specialist	More than 15 years	Specialized hospital (tertiary)	31-40	Strongly agree	Strongly agree	Agree	Strongly agree	Agree	Agree	Strongly agree	Overall ultrasound morphology of the ovary, Attention to any of the following specific features e.g. irregular wall, number of cysts, septation, solid areas, papillation or echogenecity, Presence of abnormal morphology on both sides, Presence of doppler signal in abnormal area, Presence of ascites, Results of tumor marker CA-125, Other tumor marker, Risk of malignancy index (RMI), ADNEX model, MR…	Yes		RMI I [U=0 if no abnormality detected, U=1 if one abnormality seen, and U=3 if >1 abnormality seen, for postmenopausal M=3]	Yes		Yes	No	RMI
2022-01-19 17:28:30	Female	Madinah	Gynecology Consultant	11-15 years	Secondary hospital (150 beds or more)	less than 10	Disagree	Agree	Strongly disagree	Disagree	Strongly disagree	Agree	Neutral	Attention to any of the following specific features e.g. irregular wall, number of cysts, septation, solid areas, papillation or echogenecity, Presence of abnormal morphology on both sides, Presence of doppler signal in abnormal area	No					No	No
2022-01-19 17:34:08	Male	Madinah	Specialist	11-15 years	Secondary hospital (150 beds or more)	31-40	Disagree	Agree	Neutral	Neutral	Disagree	Disagree	Disagree	Overall ultrasound morphology of the ovary, Ovarian diameter and size, Attention to any of the following specific features e.g. irregular wall, number of cysts, septation, solid areas, papillation or echogenecity, Presence of abnormal morphology on both sides, Presence of doppler signal in abnormal area, Presence of ascites, Results of tumor marker CA-125, Other tumor marker, Risk of malignancy i…	No	This is consultant call	Not applicable	Not applicable		No	Yes	😅
2022-01-19 17:50:48	Female	Madinah	Gynecology Consultant	More than 15 years	Specialized hospital (tertiary)	21-30	Agree	Strongly agree	Agree	Agree	Agree	Agree	Strongly agree	Ovarian diameter and size	Some of them		Not applicable	Not applicable		Some of them	Sometimes
2022-01-19 18:30:50	Female	Madinah	Specialist	More than 15 years	Specialized hospital (tertiary)	31-40	Agree	Strongly agree	Strongly agree	Agree	Neutral	Neutral	Agree	Attention to any of the following specific features e.g. irregular wall, number of cysts, septation, solid areas, papillation or echogenecity, Presence of abnormal morphology on both sides, Presence of ascites, Results of tumor marker CA-125, Other tumor marker, Risk of malignancy index (RMI), ADNEX model, CT computed tomography, Patient wishes	Some of them			Some of them		Some of them	Sometimes
2022-01-19 21:56:04	Male	Madinah	Gynecology Consultant	More than 15 years	Specialized hospital (tertiary)	21-30	Agree	Neutral	Agree	Strongly agree	Disagree	Neutral	Strongly agree	Overall ultrasound morphology of the ovary, Attention to any of the following specific features e.g. irregular wall, number of cysts, septation, solid areas, papillation or echogenecity, Presence of doppler signal in abnormal area, Presence of ascites, Risk of malignancy index (RMI), MRI magnetic resonance imaging, CT computed tomography, Other considerations: general medical health and suitabili…	Yes		Not applicable	Some of them	Age of patient family history may affect	No	Yes	R MI
2022-01-19 23:53:13	Male	Makkah	Gynecology Consultant	11-15 years	Teaching and Research Hospital	31-40	Strongly agree	I scan the patient myself	Strongly agree	Strongly agree	Neutral	Neutral	Neutral	Attention to any of the following specific features e.g. irregular wall, number of cysts, septation, solid areas, papillation or echogenecity, Presence of abnormal morphology on both sides, Presence of doppler signal in abnormal area, Presence of ascites, Results of tumor marker CA-125, Other tumor marker, Risk of malignancy index (RMI), Patient wishes	Yes		RMI II [U=1 if no or 1 abnormality seen, U=4 if >2 abnormality detected, for postmenopausal M=4]	Yes	According to the guidelines	No	No
2022-01-20 12:41:31	Male	Riyadh	Gynecology Consultant	6-10 years	Specialized hospital (tertiary)	10-20	Agree	Strongly agree	Strongly agree	Agree	Disagree	Agree	Disagree	Ovarian diameter and size, Attention to any of the following specific features e.g. irregular wall, number of cysts, septation, solid areas, papillation or echogenecity, Presence of abnormal morphology on both sides, Presence of doppler signal in abnormal area, Presence of ascites, Results of tumor marker CA-125, Other tumor marker, Risk of malignancy index (RMI), ADNEX model, MRI magnetic resona…	No	Not aware		No	I rely on Ca125 and US features without calculating the risk	No	No
2022-01-20 17:10:34	Male	Madinah	Gynecology Consultant	More than 15 years	Specialized hospital (tertiary)	21-30	Disagree	Agree	Agree	Agree	Agree	Agree	Agree	Overall ultrasound morphology of the ovary, Ovarian diameter and size, Attention to any of the following specific features e.g. irregular wall, number of cysts, septation, solid areas, papillation or echogenecity, Presence of abnormal morphology on both sides, Presence of doppler signal in abnormal area, Presence of ascites, Results of tumor marker CA-125, Other tumor marker, Risk of malignancy i…	Yes		RMI II [U=1 if no or 1 abnormality seen, U=4 if >2 abnormality detected, for postmenopausal M=4]	Yes	Time & Location	No	No
2022-02-07 15:26:34	Female	Makkah	Gyne oncology consultant	11-15 years	Teaching and Research Hospital	10-20	Strongly agree	Disagree	Strongly agree	Strongly agree	Disagree	Agree	Strongly agree	Attention to any of the following specific features e.g. irregular wall, number of cysts, septation, solid areas, papillation or echogenecity, Presence of doppler signal in abnormal area, Presence of ascites, Results of tumor marker CA-125, Other tumor marker	Yes		RMI II [U=1 if no or 1 abnormality seen, U=4 if >2 abnormality detected, for postmenopausal M=4]	No		No	Sometimes	RMi
2022-02-08 00:09:23	Female	Makkah	Gynecology Consultant	6-10 years	Teaching and Research Hospital	10-20	Neutral	Strongly agree	Agree	Strongly agree	Disagree	Not applicable	Neutral	Overall ultrasound morphology of the ovary, Attention to any of the following specific features e.g. irregular wall, number of cysts, septation, solid areas, papillation or echogenecity, Presence of abnormal morphology on both sides, Presence of doppler signal in abnormal area, Presence of ascites, Results of tumor marker CA-125, Other tumor marker, Risk of malignancy index (RMI), MRI magnetic re…	Yes		RMI I [U=0 if no abnormality detected, U=1 if one abnormality seen, and U=3 if >1 abnormality seen, for postmenopausal M=3]	Some of them		No	Rarely
2022-02-20 04:43:52	Female	Makkah	Gynecology Consultant	2-5 years	Secondary hospital (150 beds or more)	less than 10	Disagree	Strongly disagree	Neutral	Disagree	Disagree	Strongly disagree	Disagree	Overall ultrasound morphology of the ovary, Presence of ascites, Results of tumor marker CA-125, Risk of malignancy index (RMI), MRI magnetic resonance imaging, CT computed tomography	Yes		Other version (RMI IV)	Some of them		Some of them	Sometimes	0
2022-02-20 06:38:33	Female	Makkah	Specialist	6-10 years	Secondary hospital (150 beds or more)	31-40	Agree	Agree	Disagree	Strongly agree	Agree	Agree	Agree	Overall ultrasound morphology of the ovary, Ovarian diameter and size, Attention to any of the following specific features e.g. irregular wall, number of cysts, septation, solid areas, papillation or echogenecity, Presence of abnormal morphology on both sides, Presence of doppler signal in abnormal area, Presence of ascites, Risk of malignancy index (RMI), MRI magnetic resonance imaging	Yes		RMI I [U=0 if no abnormality detected, U=1 if one abnormality seen, and U=3 if >1 abnormality seen, for postmenopausal M=3]	Yes	That mean pt needs to be referred to gyneoncology centre	No	No
2022-02-20 07:03:21	Female	Makkah	Gynecology Consultant	11-15 years	Teaching and Research Hospital	31-40	Strongly agree	I scan the patient myself	Agree	Strongly agree	Strongly agree	Strongly disagree	Agree	Overall ultrasound morphology of the ovary, Attention to any of the following specific features e.g. irregular wall, number of cysts, septation, solid areas, papillation or echogenecity, Presence of doppler signal in abnormal area, Results of tumor marker CA-125, MRI magnetic resonance imaging	Some of them		Other version (RMI IV)	No		Some of them	Sometimes	Iota
2022-02-21 17:02:17	Female	Makkah	Specialist	11-15 years	Secondary hospital (150 beds or more)	10-20	Strongly agree	Neutral	Agree	Strongly agree	Disagree	Disagree	Neutral	Overall ultrasound morphology of the ovary, Attention to any of the following specific features e.g. irregular wall, number of cysts, septation, solid areas, papillation or echogenecity, Presence of abnormal morphology on both sides, Presence of doppler signal in abnormal area, Presence of ascites, Results of tumor marker CA-125, Risk of malignancy index (RMI), ADNEX model, MRI magnetic resonance…	Yes		RMI II [U=1 if no or 1 abnormality seen, U=4 if >2 abnormality detected, for postmenopausal M=4]	Some of them		No	No
2022-02-21 17:10:25	Male	Makkah	Specialist	2-5 years	Specialized hospital (tertiary)	10-20	Agree	Agree	Strongly agree	Agree	Agree	Strongly disagree	Strongly agree	Overall ultrasound morphology of the ovary, Ovarian diameter and size, Attention to any of the following specific features e.g. irregular wall, number of cysts, septation, solid areas, papillation or echogenecity, Presence of abnormal morphology on both sides, Presence of doppler signal in abnormal area, Presence of ascites, Results of tumor marker CA-125, Other tumor marker, Risk of malignancy i…	Yes		RMI II [U=1 if no or 1 abnormality seen, U=4 if >2 abnormality detected, for postmenopausal M=4]	Yes	Risk of malignancy	Yes	No
2022-02-21 17:19:16	Male	Makkah	Specialist	6-10 years	Secondary hospital (150 beds or more)	10-20	Agree	Neutral	Agree	Strongly agree	Neutral	Neutral	Neutral	Ovarian diameter and size, Attention to any of the following specific features e.g. irregular wall, number of cysts, septation, solid areas, papillation or echogenecity, Presence of ascites, Results of tumor marker CA-125, Risk of malignancy index (RMI), Patient wishes	Yes		Not applicable	Yes		No	Yes
2022-02-21 17:22:00	Female	Makkah	Specialist	6-10 years	Secondary hospital (150 beds or more)	31-40	Neutral	Strongly agree	Strongly agree	Strongly agree	Disagree	Neutral	Neutral	Overall ultrasound morphology of the ovary, Presence of abnormal morphology on both sides, Presence of ascites, Results of tumor marker CA-125, Risk of malignancy index (RMI), MRI magnetic resonance imaging, Patient wishes	Yes		RMI II [U=1 if no or 1 abnormality seen, U=4 if >2 abnormality detected, for postmenopausal M=4]	Yes		No	Sometimes	RMI
2022-02-21 17:29:25	Female	Makkah	Specialist	2-5 years	Secondary hospital (150 beds or more)	10-20	Strongly agree	Agree	Agree	Strongly agree	Agree	Strongly agree	Strongly agree	Overall ultrasound morphology of the ovary, Ovarian diameter and size, Attention to any of the following specific features e.g. irregular wall, number of cysts, septation, solid areas, papillation or echogenecity, Presence of abnormal morphology on both sides, Presence of ascites, Results of tumor marker CA-125, Other tumor marker, Risk of malignancy index (RMI), ADNEX model, MRI magnetic resonan…	Yes		RMI I [U=0 if no abnormality detected, U=1 if one abnormality seen, and U=3 if >1 abnormality seen, for postmenopausal M=3]	Yes	Some need gyneoncologist and oncology. Centre	Some of them	No
2022-02-23 06:36:07	Male	Makkah	Specialist	6-10 years	Secondary hospital (150 beds or more)	21-30	Agree	Strongly disagree	Agree	Strongly agree	Agree	Strongly agree	Neutral	Attention to any of the following specific features e.g. irregular wall, number of cysts, septation, solid areas, papillation or echogenecity, Presence of doppler signal in abnormal area, Presence of ascites, Results of tumor marker CA-125, Other tumor marker, Risk of malignancy index (RMI), ADNEX model, MRI magnetic resonance imaging, CT computed tomography, Other considerations: general medical…	Yes		RMI II [U=1 if no or 1 abnormality seen, U=4 if >2 abnormality detected, for postmenopausal M=4]	No	More than 200 .. transfer the pt to Gyneonclogy	No	No
2022-02-24 13:11:54	Female	Makkah	Gynecology Consultant	More than 15 years	Secondary hospital (150 beds or more)	less than 10	Agree	Disagree	Strongly agree	Agree	Disagree	Not applicable	Neutral	Overall ultrasound morphology of the ovary, Ovarian diameter and size, Attention to any of the following specific features e.g. irregular wall, number of cysts, septation, solid areas, papillation or echogenecity, Presence of abnormal morphology on both sides, Presence of doppler signal in abnormal area, Presence of ascites, Results of tumor marker CA-125, Other tumor marker, Risk of malignancy i…	Yes		RMI I [U=0 if no abnormality detected, U=1 if one abnormality seen, and U=3 if >1 abnormality seen, for postmenopausal M=3]	Yes		No	No
2022-02-25 20:48:55	Female	Makkah	Gynecology Consultant	11-15 years	Teaching and Research Hospital	31-40	Strongly agree	Strongly agree	Strongly agree	Strongly agree	Disagree	Agree	Agree	Overall ultrasound morphology of the ovary, Ovarian diameter and size, Attention to any of the following specific features e.g. irregular wall, number of cysts, septation, solid areas, papillation or echogenecity, Presence of abnormal morphology on both sides, Presence of doppler signal in abnormal area, Presence of ascites, Results of tumor marker CA-125, Other tumor marker, Risk of malignancy i…	Yes		Other version (RMI IV)	Yes		No	No
2022-02-25 20:52:45	Female	Makkah	Specialist	2-5 years	Specialized hospital (tertiary)	10-20	Agree	Strongly agree	Agree	Strongly agree	Agree	Neutral	Neutral	Overall ultrasound morphology of the ovary, Attention to any of the following specific features e.g. irregular wall, number of cysts, septation, solid areas, papillation or echogenecity, Presence of abnormal morphology on both sides, Presence of doppler signal in abnormal area, Presence of ascites, Results of tumor marker CA-125, Other tumor marker, Risk of malignancy index (RMI), CT computed tom…	Yes		RMI I [U=0 if no abnormality detected, U=1 if one abnormality seen, and U=3 if >1 abnormality seen, for postmenopausal M=3]	No		No	No
2022-02-25 20:54:43	Female	Eastern Region	Gyne oncology consultant	6-10 years	Specialized hospital (tertiary)	21-30	Agree	Agree	Agree	Agree	Agree	Agree	Agree	Overall ultrasound morphology of the ovary, Ovarian diameter and size, Attention to any of the following specific features e.g. irregular wall, number of cysts, septation, solid areas, papillation or echogenecity, Presence of abnormal morphology on both sides, Presence of ascites, Results of tumor marker CA-125, Other tumor marker, CT computed tomography, Patient wishes	Yes		RMI I [U=0 if no abnormality detected, U=1 if one abnormality seen, and U=3 if >1 abnormality seen, for postmenopausal M=3]	Some of them		Some of them	Sometimes
2022-02-25 20:56:20	Male	Riyadh	Gyne oncology consultant	2-5 years	Specialized hospital (tertiary)	10-20	Neutral	Strongly agree	Strongly agree	Strongly agree	Strongly agree	Strongly agree	Strongly agree	Attention to any of the following specific features e.g. irregular wall, number of cysts, septation, solid areas, papillation or echogenecity, Presence of abnormal morphology on both sides, Presence of doppler signal in abnormal area, Presence of ascites, Results of tumor marker CA-125, Other tumor marker, Risk of malignancy index (RMI), ADNEX model, MRI magnetic resonance imaging, CT computed to…	Yes		RMI I [U=0 if no abnormality detected, U=1 if one abnormality seen, and U=3 if >1 abnormality seen, for postmenopausal M=3]	Some of them	No surgery in low score with ovarian simple cyst	No	Yes
2022-02-25 21:00:55	Male	Asir	Gynecology Consultant	6-10 years	Secondary hospital (150 beds or more)	10-20	Strongly agree	Agree	Agree	Agree	Disagree	Strongly agree	Disagree	Overall ultrasound morphology of the ovary, Ovarian diameter and size, Attention to any of the following specific features e.g. irregular wall, number of cysts, septation, solid areas, papillation or echogenecity, Presence of abnormal morphology on both sides, Presence of doppler signal in abnormal area, Presence of ascites, Results of tumor marker CA-125, Other tumor marker, Risk of malignancy i…	Yes		RMI I [U=0 if no abnormality detected, U=1 if one abnormality seen, and U=3 if >1 abnormality seen, for postmenopausal M=3]	Yes	It gives a clue about the risk	No	No
2022-02-25 21:02:39	Male	Riyadh	Gyne oncology consultant	More than 15 years	Specialized hospital (tertiary)	21-30	Neutral	Strongly agree	Neutral	Agree	Disagree	Not applicable	Agree	Overall ultrasound morphology of the ovary, Presence of abnormal morphology on both sides, Presence of ascites, Results of tumor marker CA-125, Risk of malignancy index (RMI), MRI magnetic resonance imaging, CT computed tomography	No	Not used in my or my group practice	Not applicable	Not applicable	Not practiced	No	No
2022-02-25 21:04:22	Male	Makkah	Gynecology Consultant	More than 15 years	Specialized hospital (tertiary)	21-30	Agree	Strongly agree	Agree	Strongly agree	Agree	Agree	Agree	Overall ultrasound morphology of the ovary, Attention to any of the following specific features e.g. irregular wall, number of cysts, septation, solid areas, papillation or echogenecity, Presence of abnormal morphology on both sides, Presence of ascites, Results of tumor marker CA-125, Other tumor marker, Risk of malignancy index (RMI), ADNEX model, MRI magnetic resonance imaging, CT computed tom…	Yes		RMI I [U=0 if no abnormality detected, U=1 if one abnormality seen, and U=3 if >1 abnormality seen, for postmenopausal M=3]	Some of them	Depends on other factors	Yes	No
2022-02-25 21:04:33	Female	Makkah	Specialist	6-10 years	Specialized hospital (tertiary)	10-20	Neutral	Strongly agree	Neutral	Neutral	Strongly disagree	Strongly agree	Strongly agree	Attention to any of the following specific features e.g. irregular wall, number of cysts, septation, solid areas, papillation or echogenecity, Presence of ascites, Other considerations: general medical health and suitability for surgery, Patient wishes	No	I do not see the benefit when it can be assessed over all on patient’s age, tumor markers and features on ultrasound as well as her wishes without the need for a mathematical module. Rather than a mathematical stratification it is easily done robustly.		No	Patient’s wishes should always be the number one factor in decision making.	No	No
2022-02-25 21:12:16	Male	Makkah	Specialist	2-5 years	Secondary hospital (150 beds or more)	10-20	Agree	Strongly agree	Agree	Strongly agree	Disagree	Neutral	Neutral	Overall ultrasound morphology of the ovary, Ovarian diameter and size, Attention to any of the following specific features e.g. irregular wall, number of cysts, septation, solid areas, papillation or echogenecity, Presence of abnormal morphology on both sides, Presence of doppler signal in abnormal area, Presence of ascites, Results of tumor marker CA-125, Other tumor marker, Risk of malignancy i…	Yes		Other version (RMI IV)	No		No	No
2022-02-25 21:28:25	Female	Eastern Region	Gyne oncology consultant	6-10 years	Secondary hospital (150 beds or more)	21-30	Neutral	Neutral	Agree	Strongly agree	Disagree	Disagree	Strongly agree	Attention to any of the following specific features e.g. irregular wall, number of cysts, septation, solid areas, papillation or echogenecity, Presence of doppler signal in abnormal area, Presence of ascites, Results of tumor marker CA-125, Risk of malignancy index (RMI), MRI magnetic resonance imaging, CT computed tomography	Yes		RMI II [U=1 if no or 1 abnormality seen, U=4 if >2 abnormality detected, for postmenopausal M=4]	Some of them	It depends on clinicall data	No	No
2022-02-25 21:35:10	Female	Riyadh	Specialist	6-10 years	Specialized hospital (tertiary)	10-20	Neutral	Neutral	Agree	Strongly agree	Disagree	Neutral	Agree	Attention to any of the following specific features e.g. irregular wall, number of cysts, septation, solid areas, papillation or echogenecity, Presence of ascites, Results of tumor marker CA-125, Other tumor marker, Risk of malignancy index (RMI), Other considerations: general medical health and suitability for surgery	Yes		RMI I [U=0 if no abnormality detected, U=1 if one abnormality seen, and U=3 if >1 abnormality seen, for postmenopausal M=3]	Yes	High tumor markers + sonography’s high risk features and post menopausal = intervention	No	No
2022-02-25 21:40:46	Female	Riyadh	Specialist	6-10 years	Teaching and Research Hospital	less than 10	Agree	Strongly disagree	Agree	Strongly agree	Neutral	Agree	Strongly agree	Risk of malignancy index (RMI)	Yes		RMI I [U=0 if no abnormality detected, U=1 if one abnormality seen, and U=3 if >1 abnormality seen, for postmenopausal M=3]	Yes	If benign i will not go for staging	No	Yes	RMI what we get experience on it
2022-02-25 21:41:22	Female	Asir	Specialist	2-5 years	Specialized hospital (tertiary)	10-20	Neutral	Neutral	Neutral	Neutral	Strongly disagree	Not applicable	Strongly agree	Overall ultrasound morphology of the ovary, Ovarian diameter and size, Attention to any of the following specific features e.g. irregular wall, number of cysts, septation, solid areas, papillation or echogenecity, Presence of abnormal morphology on both sides, Presence of doppler signal in abnormal area, Presence of ascites, Results of tumor marker CA-125, Other tumor marker, ADNEX model, MRI mag…	Some of them		Not applicable	No	No update , the well not changed the plan of management ..	No	No
2022-02-25 21:48:03	Female	Makkah	Specialist	2-5 years	Specialized hospital (tertiary)	10-20	Neutral	Strongly agree	Strongly agree	Strongly agree	Strongly disagree	Not applicable	Neutral	Attention to any of the following specific features e.g. irregular wall, number of cysts, septation, solid areas, papillation or echogenecity, Presence of abnormal morphology on both sides, Presence of ascites, Results of tumor marker CA-125, Other tumor marker, Risk of malignancy index (RMI), ADNEX model, MRI magnetic resonance imaging, CT computed tomography, Other considerations: general medic…	Yes		RMI I [U=0 if no abnormality detected, U=1 if one abnormality seen, and U=3 if >1 abnormality seen, for postmenopausal M=3]	No	It helps in decision making	No	No
2022-02-25 21:51:02	Male	Eastern Region	Gyne oncology consultant	More than 15 years	Specialized hospital (tertiary)	21-30	Neutral	Strongly agree	Strongly agree	Strongly agree	Strongly agree	Strongly agree	Strongly agree	Overall ultrasound morphology of the ovary, Ovarian diameter and size, Attention to any of the following specific features e.g. irregular wall, number of cysts, septation, solid areas, papillation or echogenecity, Presence of abnormal morphology on both sides, Presence of ascites, Results of tumor marker CA-125, Risk of malignancy index (RMI), MRI magnetic resonance imaging, Patient wishes	Some of them		RMI II [U=1 if no or 1 abnormality seen, U=4 if >2 abnormality detected, for postmenopausal M=4]	Some of them		Some of them	Yes
2022-02-25 21:53:11	Female	Riyadh	Gynecology Consultant	More than 15 years	Teaching and Research Hospital	less than 10	Disagree	Strongly agree	Agree	Agree	Disagree	Neutral	Disagree	Overall ultrasound morphology of the ovary, Ovarian diameter and size, Attention to any of the following specific features e.g. irregular wall, number of cysts, septation, solid areas, papillation or echogenecity, Presence of abnormal morphology on both sides, Presence of doppler signal in abnormal area, Presence of ascites, Results of tumor marker CA-125, Other tumor marker, Risk of malignancy i…	No	No patients		Yes		No	No
2022-02-25 21:54:11	Female	Riyadh	Gynecology Consultant	11-15 years	Teaching and Research Hospital	31-40	Strongly agree	Strongly agree	Strongly agree	Strongly agree	Disagree	Neutral	Neutral	ADNEX model	Some of them		Not applicable	Some of them	If fit for surgery or not	No	No
2022-02-25 22:05:06	Female	Makkah	Gynecology Consultant	11-15 years	Teaching and Research Hospital	10-20	Disagree	Agree	Agree	Agree	Disagree	Neutral	Agree	Ovarian diameter and size, Attention to any of the following specific features e.g. irregular wall, number of cysts, septation, solid areas, papillation or echogenecity, Presence of abnormal morphology on both sides, Results of tumor marker CA-125, Risk of malignancy index (RMI), Patient wishes	Yes		RMI I [U=0 if no abnormality detected, U=1 if one abnormality seen, and U=3 if >1 abnormality seen, for postmenopausal M=3]	Some of them	-	No	Yes	Size , irregularity, septation , projections
2022-02-25 22:08:27	Female	Makkah	Gynecology Consultant	11-15 years	Specialized hospital (tertiary)	21-30	Strongly agree	Strongly agree	Agree	Agree	Disagree	Strongly disagree	Neutral	Overall ultrasound morphology of the ovary, Ovarian diameter and size, Presence of abnormal morphology on both sides	No		RMI II [U=1 if no or 1 abnormality seen, U=4 if >2 abnormality detected, for postmenopausal M=4]	Some of them		No	No
2022-02-25 22:22:40	Male	Makkah	Gyne oncology consultant	11-15 years	Specialized hospital (tertiary)	21-30	Agree	Neutral	Agree	Agree	Disagree	Agree	Agree	Attention to any of the following specific features e.g. irregular wall, number of cysts, septation, solid areas, papillation or echogenecity, Presence of abnormal morphology on both sides, Presence of ascites, Results of tumor marker CA-125, Risk of malignancy index (RMI), ADNEX model, MRI magnetic resonance imaging, CT computed tomography, Other considerations: general medical health and suitab…	No	Working in a tertiary referral center , referred and accepted patients have highly suspicious features		Yes		No	No
2022-02-25 22:36:43	Male	Asir	Specialist	11-15 years	Specialized hospital (tertiary)	31-40	Strongly agree	Agree	Neutral	Strongly agree	Strongly agree	Neutral	Strongly agree	Overall ultrasound morphology of the ovary, Ovarian diameter and size, Attention to any of the following specific features e.g. irregular wall, number of cysts, septation, solid areas, papillation or echogenecity, Presence of abnormal morphology on both sides, Presence of doppler signal in abnormal area, Presence of ascites, Results of tumor marker CA-125, Other tumor marker, Risk of malignancy i…	Yes		RMI I [U=0 if no abnormality detected, U=1 if one abnormality seen, and U=3 if >1 abnormality seen, for postmenopausal M=3]	Some of them		Yes	Sometimes	RMI
2022-02-25 22:47:32	Female	Riyadh	Gynecology Consultant	More than 15 years	Specialized hospital (tertiary)	10-20	Agree	Agree	Disagree	Strongly agree	Disagree	Agree	Strongly disagree	Attention to any of the following specific features e.g. irregular wall, number of cysts, septation, solid areas, papillation or echogenecity, Presence of ascites, Results of tumor marker CA-125, Risk of malignancy index (RMI), Other considerations: general medical health and suitability for surgery	Yes		Not applicable	No	Some times I need to do ovarian cystectomy even RMI is low.	No	No	RMI . It is easy
2022-02-25 23:07:40	Male	Riyadh	Gyne oncology consultant	More than 15 years	Specialized hospital (tertiary)	21-30	Disagree	Strongly agree	Strongly agree	Strongly agree	Strongly agree	Neutral	Strongly agree	Attention to any of the following specific features e.g. irregular wall, number of cysts, septation, solid areas, papillation or echogenecity, Presence of abnormal morphology on both sides, Presence of ascites, Results of tumor marker CA-125, Risk of malignancy index (RMI), ADNEX model	Yes		RMI II [U=1 if no or 1 abnormality seen, U=4 if >2 abnormality detected, for postmenopausal M=4]	Yes		Yes	Yes	RMI . More applicable for my practice setting
2022-02-25 23:08:05	Female	Makkah	Specialist	More than 15 years	Specialized hospital (tertiary)	10-20	Neutral	Strongly agree	Strongly agree	Strongly agree	Agree	Agree	Neutral	Ovarian diameter and size, Attention to any of the following specific features e.g. irregular wall, number of cysts, septation, solid areas, papillation or echogenecity, Presence of abnormal morphology on both sides, Presence of doppler signal in abnormal area, Results of tumor marker CA-125, Risk of malignancy index (RMI)	Yes		RMI I [U=0 if no abnormality detected, U=1 if one abnormality seen, and U=3 if >1 abnormality seen, for postmenopausal M=3]	Yes	Standardization	No	No	N/A
2022-02-26 04:26:09	Female	Makkah	Specialist	6-10 years	Secondary hospital (150 beds or more)	21-30	Agree	Agree	Agree	Agree	Disagree	Agree	Agree	Overall ultrasound morphology of the ovary, Ovarian diameter and size, Attention to any of the following specific features e.g. irregular wall, number of cysts, septation, solid areas, papillation or echogenecity, Presence of ascites, Results of tumor marker CA-125, Other tumor marker, Risk of malignancy index (RMI), Other considerations: general medical health and suitability for surgery, Patien…	Yes		RMI I [U=0 if no abnormality detected, U=1 if one abnormality seen, and U=3 if >1 abnormality seen, for postmenopausal M=3]	Yes		No	No
2022-02-26 08:23:05	Male	Riyadh	Gynecology Consultant	More than 15 years	Teaching and Research Hospital	21-30	Disagree	Neutral	Agree	Agree	Disagree	Agree	Agree	Overall ultrasound morphology of the ovary, Ovarian diameter and size, Attention to any of the following specific features e.g. irregular wall, number of cysts, septation, solid areas, papillation or echogenecity, Presence of abnormal morphology on both sides, Presence of doppler signal in abnormal area, Presence of ascites, Results of tumor marker CA-125, Other tumor marker, Risk of malignancy i…	Some of them		RMI I [U=0 if no abnormality detected, U=1 if one abnormality seen, and U=3 if >1 abnormality seen, for postmenopausal M=3]	Yes	Yes because if solid components the score is high .	Some of them	Yes	RMI
2022-02-26 15:57:30	Female	Riyadh	Gynecology Consultant	More than 15 years	Secondary hospital (150 beds or more)	less than 10	Disagree	Strongly agree	Strongly agree	Strongly agree	Neutral	Neutral	Agree	Presence of abnormal morphology on both sides, Presence of doppler signal in abnormal area, Presence of ascites, Other tumor marker, Risk of malignancy index (RMI), MRI magnetic resonance imaging, CT computed tomography, Other considerations: general medical health and suitability for surgery	Some of them		Not applicable	Not applicable		No	Sometimes
2022-02-26 19:41:37	Female	Riyadh	Gynecology Consultant	More than 15 years	Teaching and Research Hospital	10-20	Agree	Agree	Agree	Agree	Agree	Neutral	Agree	Overall ultrasound morphology of the ovary, Ovarian diameter and size, Attention to any of the following specific features e.g. irregular wall, number of cysts, septation, solid areas, papillation or echogenecity, Presence of abnormal morphology on both sides, Presence of doppler signal in abnormal area, Presence of ascites, Results of tumor marker CA-125, Other tumor marker, Risk of malignancy i…	No			No	I considered all futcher and clinically	No	Yes	Non
2022-02-26 22:02:07	Female	Makkah	Gynecology Consultant	More than 15 years	Secondary hospital (150 beds or more)	31-40	Neutral	Strongly agree	Strongly agree	Strongly agree	Neutral	Neutral	Neutral	Overall ultrasound morphology of the ovary, Ovarian diameter and size, Attention to any of the following specific features e.g. irregular wall, number of cysts, septation, solid areas, papillation or echogenecity, Presence of abnormal morphology on both sides, Presence of doppler signal in abnormal area, Presence of ascites, Results of tumor marker CA-125, Other tumor marker, Risk of malignancy i…	Yes		RMI I [U=0 if no abnormality detected, U=1 if one abnormality seen, and U=3 if >1 abnormality seen, for postmenopausal M=3]	Yes	Because increase suspection of malignancy	No	No
2022-02-26 22:02:29	Female	Makkah	Gynecology Consultant	More than 15 years	Secondary hospital (150 beds or more)	31-40	Neutral	Strongly agree	Strongly agree	Strongly agree	Neutral	Neutral	Neutral	Overall ultrasound morphology of the ovary, Ovarian diameter and size, Attention to any of the following specific features e.g. irregular wall, number of cysts, septation, solid areas, papillation or echogenecity, Presence of abnormal morphology on both sides, Presence of doppler signal in abnormal area, Presence of ascites, Results of tumor marker CA-125, Other tumor marker, Risk of malignancy i…	Yes		RMI I [U=0 if no abnormality detected, U=1 if one abnormality seen, and U=3 if >1 abnormality seen, for postmenopausal M=3]	Yes	Because increase suspection of malignancy	No	No
2022-02-27 13:31:40	Male	Makkah	Specialist	More than 15 years	Secondary hospital (150 beds or more)	21-30	Agree	Agree	Neutral	Agree	Neutral	Agree	Agree	Overall ultrasound morphology of the ovary, Ovarian diameter and size, Attention to any of the following specific features e.g. irregular wall, number of cysts, septation, solid areas, papillation or echogenecity, Presence of abnormal morphology on both sides, Presence of doppler signal in abnormal area, Presence of ascites, Results of tumor marker CA-125, Other tumor marker, Risk of malignancy i…	Yes		RMI II [U=1 if no or 1 abnormality seen, U=4 if >2 abnormality detected, for postmenopausal M=4]	Yes		No	Yes
2022-02-27 21:13:10	Female	Riyadh	Gynecology Consultant	11-15 years	Specialized hospital (tertiary)	21-30	Agree	Strongly agree	Strongly agree	Strongly agree	Disagree	Neutral	Neutral	Overall ultrasound morphology of the ovary, Ovarian diameter and size, Attention to any of the following specific features e.g. irregular wall, number of cysts, septation, solid areas, papillation or echogenecity, Presence of abnormal morphology on both sides, Presence of doppler signal in abnormal area, Presence of ascites, Results of tumor marker CA-125, Other tumor marker, Risk of malignancy i…	Yes		RMI I [U=0 if no abnormality detected, U=1 if one abnormality seen, and U=3 if >1 abnormality seen, for postmenopausal M=3]	Yes		No	No
2022-03-01 21:44:51	Female	Madinah	Specialist	More than 15 years	Secondary hospital (150 beds or more)	31-40	Agree	I scan the patient myself	Strongly agree	Neutral	Neutral	Agree	Agree	MRI magnetic resonance imaging	Yes		Not applicable	Yes		Some of them	Rarely
2022-03-01 21:58:03	Female	Qassim	Gynecology Consultant	More than 15 years	Specialized hospital (tertiary)	31-40	Neutral	Agree	Agree	Strongly agree	Disagree	Agree	Agree	Overall ultrasound morphology of the ovary, Ovarian diameter and size, Attention to any of the following specific features e.g. irregular wall, number of cysts, septation, solid areas, papillation or echogenecity, Presence of abnormal morphology on both sides, Presence of doppler signal in abnormal area, Presence of ascites, Results of tumor marker CA-125, Other tumor marker, Risk of malignancy i…	Yes		RMI I [U=0 if no abnormality detected, U=1 if one abnormality seen, and U=3 if >1 abnormality seen, for postmenopausal M=3]	Yes		No	No
2022-03-01 22:13:56	Female	Qassim	Specialist	11-15 years	Specialized hospital (tertiary)	10-20	Agree	Strongly agree	Neutral	Agree	Neutral	Agree	Agree	Overall ultrasound morphology of the ovary, Ovarian diameter and size, Attention to any of the following specific features e.g. irregular wall, number of cysts, septation, solid areas, papillation or echogenecity, Presence of abnormal morphology on both sides, Presence of doppler signal in abnormal area, Presence of ascites, Results of tumor marker CA-125, Other tumor marker, Risk of malignancy i…	Yes		RMI I [U=0 if no abnormality detected, U=1 if one abnormality seen, and U=3 if >1 abnormality seen, for postmenopausal M=3]	Some of them		No	No
2022-03-01 22:24:43	Female	Qassim	Specialist	11-15 years	Secondary hospital (150 beds or more)	21-30	Strongly agree	I scan the patient myself	Strongly agree	Strongly agree	Neutral	Strongly agree	Strongly agree	Overall ultrasound morphology of the ovary, Ovarian diameter and size, Attention to any of the following specific features e.g. irregular wall, number of cysts, septation, solid areas, papillation or echogenecity, Presence of abnormal morphology on both sides, Presence of ascites, Results of tumor marker CA-125, Other tumor marker, Risk of malignancy index (RMI), MRI magnetic resonance imaging, O…	Yes		RMI I [U=0 if no abnormality detected, U=1 if one abnormality seen, and U=3 if >1 abnormality seen, for postmenopausal M=3]	Yes	Patients with high RMI referred to tertiary unit	No	No	RMI
2022-03-08 15:45:31	Female	Makkah	Specialist	6-10 years	Secondary hospital (150 beds or more)	31-40	Agree	Agree	Agree	Agree	Agree	Agree	Agree	Overall ultrasound morphology of the ovary, Attention to any of the following specific features e.g. irregular wall, number of cysts, septation, solid areas, papillation or echogenecity, Presence of ascites, Results of tumor marker CA-125, Risk of malignancy index (RMI), MRI magnetic resonance imaging	Yes		RMI I [U=0 if no abnormality detected, U=1 if one abnormality seen, and U=3 if >1 abnormality seen, for postmenopausal M=3]	Some of them		Yes	No
2022-05-21 16:14:02	Female	Eastern Region	Specialist	More than 15 years	Secondary hospital (150 beds or more)	31-40	Neutral	Agree	Strongly agree	Strongly agree	Agree	Strongly agree	Strongly agree	Overall ultrasound morphology of the ovary, Attention to any of the following specific features e.g. irregular wall, number of cysts, septation, solid areas, papillation or echogenecity, Presence of doppler signal in abnormal area, Presence of ascites, Other tumor marker, Risk of malignancy index (RMI), CT computed tomography	Yes		RMI II [U=1 if no or 1 abnormality seen, U=4 if >2 abnormality detected, for postmenopausal M=4]	No		No	No
2022-05-22 16:33:11	Female	Makkah	Gynecology Consultant	11-15 years	Secondary hospital (150 beds or more)	21-30	Agree	Agree	Agree	Disagree	Disagree	Disagree	Disagree	Overall ultrasound morphology of the ovary, Ovarian diameter and size, Attention to any of the following specific features e.g. irregular wall, number of cysts, septation, solid areas, papillation or echogenecity, Presence of abnormal morphology on both sides, Presence of doppler signal in abnormal area, Presence of ascites, Results of tumor marker CA-125, Other tumor marker, Risk of malignancy i…	No		RMI I [U=0 if no abnormality detected, U=1 if one abnormality seen, and U=3 if >1 abnormality seen, for postmenopausal M=3]	Not applicable		No	No
2022-05-22 16:36:12	Male	Riyadh	Gynecology Consultant	More than 15 years	Teaching and Research Hospital	31-40	Disagree	Agree	Agree	Disagree	Strongly disagree	Neutral	Neutral	Overall ultrasound morphology of the ovary, Ovarian diameter and size, Attention to any of the following specific features e.g. irregular wall, number of cysts, septation, solid areas, papillation or echogenecity, Presence of abnormal morphology on both sides, Presence of doppler signal in abnormal area, Presence of ascites, Results of tumor marker CA-125, MRI magnetic resonance imaging, CT compu…	Some of them		Not applicable	Not applicable		No	Rarely
2022-05-22 16:51:10	Female	Riyadh	Gynecology Consultant	More than 15 years	Specialized hospital (tertiary)	10-20	Agree	Agree	Agree	Agree	Agree	Agree	Neutral	Overall ultrasound morphology of the ovary, Ovarian diameter and size, Attention to any of the following specific features e.g. irregular wall, number of cysts, septation, solid areas, papillation or echogenecity, Presence of abnormal morphology on both sides, Presence of doppler signal in abnormal area, Presence of ascites, Results of tumor marker CA-125, Other tumor marker, Risk of malignancy i…	Yes		Other version (RMI IV)	Yes		Yes	Yes
2022-05-22 21:33:38	Female	Eastern Region	Gynecology Consultant	More than 15 years	Secondary hospital (150 beds or more)	10-20	Strongly agree	Agree	Strongly agree	Agree	Neutral	Strongly agree	Agree	Overall ultrasound morphology of the ovary, Attention to any of the following specific features e.g. irregular wall, number of cysts, septation, solid areas, papillation or echogenecity, Presence of ascites, Results of tumor marker CA-125, Other tumor marker, Risk of malignancy index (RMI), ADNEX model, MRI magnetic resonance imaging, CT computed tomography, Other considerations: general medical …	No	We reffer them to oncology center	Not applicable	Yes	I dont know	No	No	I dont
2022-05-22 21:36:27	Female	Riyadh	Gynecology Consultant	More than 15 years	Secondary hospital (150 beds or more)	10-20	Agree	Agree	Agree	Agree	Disagree	Agree	Neutral	Attention to any of the following specific features e.g. irregular wall, number of cysts, septation, solid areas, papillation or echogenecity, Presence of abnormal morphology on both sides, Presence of doppler signal in abnormal area, Presence of ascites, Results of tumor marker CA-125, Other tumor marker, Risk of malignancy index (RMI), ADNEX model, CT computed tomography, Other considerations: …	No	I’ll refer the case to Gyn oncologist		Some of them	The pt general condition is highly considered	No	No
2022-05-22 21:37:24	Female	Eastern Region	Gynecology Consultant	11-15 years	Specialized hospital (tertiary)	10-20	Agree	Agree	Agree	Strongly agree	Neutral	Agree	Strongly agree	Overall ultrasound morphology of the ovary, Ovarian diameter and size, Attention to any of the following specific features e.g. irregular wall, number of cysts, septation, solid areas, papillation or echogenecity, Presence of abnormal morphology on both sides, Presence of doppler signal in abnormal area, Presence of ascites, Results of tumor marker CA-125, Other tumor marker, Risk of malignancy i…	Yes		RMI II [U=1 if no or 1 abnormality seen, U=4 if >2 abnormality detected, for postmenopausal M=4]	Yes		No	Yes
2022-05-22 21:41:12	Female	Eastern Region	Gynecology Consultant	More than 15 years	Secondary hospital (150 beds or more)	21-30	Agree	Disagree	Agree	Agree	Strongly disagree	Neutral	Agree	Overall ultrasound morphology of the ovary, Ovarian diameter and size, Attention to any of the following specific features e.g. irregular wall, number of cysts, septation, solid areas, papillation or echogenecity, Presence of abnormal morphology on both sides, Presence of doppler signal in abnormal area, Presence of ascites, Results of tumor marker CA-125, Other tumor marker, Risk of malignancy i…	Yes		RMI I [U=0 if no abnormality detected, U=1 if one abnormality seen, and U=3 if >1 abnormality seen, for postmenopausal M=3]	Some of them		No	No
2022-05-22 21:43:13	Male	Riyadh	Gynecology Consultant	More than 15 years	Secondary hospital (150 beds or more)	31-40	Neutral	Disagree	Strongly agree	Strongly agree	Strongly agree	Agree	Neutral	Attention to any of the following specific features e.g. irregular wall, number of cysts, septation, solid areas, papillation or echogenecity, Presence of abnormal morphology on both sides, Presence of ascites, Results of tumor marker CA-125, Other tumor marker, ADNEX model, Other considerations: general medical health and suitability for surgery	Some of them		Other version (RMI IV)	Some of them		No	No
2022-05-22 22:14:50	Female	Riyadh	Gynecology Consultant	More than 15 years	Secondary hospital (150 beds or more)	less than 10	Agree	Strongly agree	Neutral	Agree	Agree	Agree	Neutral	Overall ultrasound morphology of the ovary, Attention to any of the following specific features e.g. irregular wall, number of cysts, septation, solid areas, papillation or echogenecity, Presence of abnormal morphology on both sides, Results of tumor marker CA-125, Other tumor marker, Risk of malignancy index (RMI), MRI magnetic resonance imaging, CT computed tomography	Some of them		RMI I [U=0 if no abnormality detected, U=1 if one abnormality seen, and U=3 if >1 abnormality seen, for postmenopausal M=3]	Some of them	Some used and other refer to oncology	Yes	No
2022-05-22 22:47:51	Male	Riyadh	Specialist	More than 15 years	Secondary hospital (150 beds or more)	21-30	Disagree	Disagree	Neutral	Strongly agree	Strongly disagree	Not applicable	Agree	Overall ultrasound morphology of the ovary, Ovarian diameter and size, Attention to any of the following specific features e.g. irregular wall, number of cysts, septation, solid areas, papillation or echogenecity, Presence of abnormal morphology on both sides, Presence of doppler signal in abnormal area, Presence of ascites, Results of tumor marker CA-125, Risk of malignancy index (RMI), MRI magn…	Yes		RMI I [U=0 if no abnormality detected, U=1 if one abnormality seen, and U=3 if >1 abnormality seen, for postmenopausal M=3]	No	RMI is to specify site of management not to change the surgical intervention	No	No	RMI... MY PRACTICE
2022-05-23 05:10:15	Female	Hail	Gynecology Consultant	More than 15 years	Specialized hospital (tertiary)	21-30	Agree	Agree	Agree	Strongly agree	Agree	Strongly agree	Strongly agree	Attention to any of the following specific features e.g. irregular wall, number of cysts, septation, solid areas, papillation or echogenecity, Presence of ascites, Results of tumor marker CA-125, Other considerations: general medical health and suitability for surgery, Patient wishes	Yes		RMI I [U=0 if no abnormality detected, U=1 if one abnormality seen, and U=3 if >1 abnormality seen, for postmenopausal M=3]	Yes	For multidiciplinary surgical intervention	No	No	RMI 1. It is simple and easy to apply. Also less resources required for it and only need skilled sonologist for acurrate irterpretation.
2022-05-23 07:30:58	Female	Eastern Region	Specialist	More than 15 years	Secondary hospital (150 beds or more)	less than 10	Agree	Strongly agree	Strongly agree	Strongly agree	Strongly agree	Strongly agree	Agree	Overall ultrasound morphology of the ovary, Ovarian diameter and size, Attention to any of the following specific features e.g. irregular wall, number of cysts, septation, solid areas, papillation or echogenecity, Presence of abnormal morphology on both sides, Presence of doppler signal in abnormal area, Presence of ascites, Results of tumor marker CA-125, Other tumor marker, Risk of malignancy i…	Some of them			Not applicable		Some of them	Sometimes
2022-05-23 07:46:28	Female	Eastern Region	Gynecology Consultant	More than 15 years	Secondary hospital (150 beds or more)	31-40	Agree	Strongly agree	Agree	Agree	Strongly agree	Agree	Strongly agree	Attention to any of the following specific features e.g. irregular wall, number of cysts, septation, solid areas, papillation or echogenecity, Presence of ascites, Results of tumor marker CA-125, Risk of malignancy index (RMI), ADNEX model, MRI magnetic resonance imaging, CT computed tomography	Yes		Not applicable	Some of them		Yes	Sometimes
2022-05-23 10:10:27	Female	Eastern Region	Gynecology Consultant	More than 15 years	Secondary hospital (150 beds or more)	10-20	Disagree	Neutral	Agree	Neutral	Disagree	Disagree	Neutral	Overall ultrasound morphology of the ovary, Ovarian diameter and size, Attention to any of the following specific features e.g. irregular wall, number of cysts, septation, solid areas, papillation or echogenecity, Presence of ascites, Results of tumor marker CA-125, Other tumor marker, Risk of malignancy index (RMI), MRI magnetic resonance imaging, CT computed tomography, Other considerations: ge…	No	No oncologist available in institute	Not applicable	Not applicable		No	No
2022-05-23 10:11:48	Female	Eastern Region	Gynecology Consultant	More than 15 years	Teaching and Research Hospital	10-20	Strongly disagree	Strongly disagree	Neutral	Neutral	Strongly disagree	Neutral	Agree	Presence of abnormal morphology on both sides, Presence of doppler signal in abnormal area, Presence of ascites, Results of tumor marker CA-125, MRI magnetic resonance imaging	Some of them		Not applicable	Some of them	I am not oncology	Some of them	No
2022-05-23 10:16:27	Female	Riyadh	Gynecology Consultant	More than 15 years	Specialized hospital (tertiary)	10-20	Neutral	Strongly agree	Agree	Strongly agree	Neutral	Neutral	Agree	Overall ultrasound morphology of the ovary, Ovarian diameter and size, Attention to any of the following specific features e.g. irregular wall, number of cysts, septation, solid areas, papillation or echogenecity, Presence of abnormal morphology on both sides, Presence of doppler signal in abnormal area, Presence of ascites, Results of tumor marker CA-125, Other tumor marker, Risk of malignancy i…	No	Because it is the job of oncology doctor		Yes	I think it is important	No	No	No
2022-05-23 12:05:15	Male	Jawf	Specialist	More than 15 years	Secondary hospital (150 beds or more)	31-40	Strongly disagree	Disagree	Agree	Agree	Disagree	Agree	Neutral	Attention to any of the following specific features e.g. irregular wall, number of cysts, septation, solid areas, papillation or echogenecity, Presence of ascites, Risk of malignancy index (RMI), MRI magnetic resonance imaging, Patient wishes	Some of them	For suspicious cases	RMI I [U=0 if no abnormality detected, U=1 if one abnormality seen, and U=3 if >1 abnormality seen, for postmenopausal M=3]	Some of them	Patient taken as a whole	No	No	Nothing
2022-05-23 13:21:04	Female	Riyadh	Gynecology Consultant	More than 15 years	Specialized hospital (tertiary)	31-40	Agree	Strongly agree	Agree	Agree	Disagree	Agree	Agree	Overall ultrasound morphology of the ovary, Ovarian diameter and size, Attention to any of the following specific features e.g. irregular wall, number of cysts, septation, solid areas, papillation or echogenecity, Presence of abnormal morphology on both sides, Presence of doppler signal in abnormal area, Presence of ascites, Results of tumor marker CA-125, Other tumor marker, Risk of malignancy i…	Some of them		RMI I [U=0 if no abnormality detected, U=1 if one abnormality seen, and U=3 if >1 abnormality seen, for postmenopausal M=3]	Some of them	The histopathology after surgery became benign	No	Sometimes	RMI used to
2022-05-23 18:03:59	Female	Riyadh	Gynecology Consultant	6-10 years	Specialized hospital (tertiary)	31-40	Neutral	Strongly agree	Strongly agree	Strongly agree	Agree	Strongly agree	Agree	Attention to any of the following specific features e.g. irregular wall, number of cysts, septation, solid areas, papillation or echogenecity, Presence of abnormal morphology on both sides, Presence of ascites, Results of tumor marker CA-125, ADNEX model, CT computed tomography, Other considerations: general medical health and suitability for surgery, Patient wishes	Some of them		RMI I [U=0 if no abnormality detected, U=1 if one abnormality seen, and U=3 if >1 abnormality seen, for postmenopausal M=3]	Some of them		Some of them	Yes
2022-05-23 21:30:57	Male	Riyadh	Gyne oncology consultant	More than 15 years	Specialized hospital (tertiary)	31-40	Strongly disagree	Strongly agree	Strongly agree	Strongly agree	Agree	Strongly agree	Agree	Overall ultrasound morphology of the ovary, Attention to any of the following specific features e.g. irregular wall, number of cysts, septation, solid areas, papillation or echogenecity, Presence of abnormal morphology on both sides, Presence of ascites, Results of tumor marker CA-125, Other tumor marker, Risk of malignancy index (RMI), ADNEX model	Some of them			Yes		Some of them	No	RMI
2022-05-24 01:27:58	Female	Riyadh	Gynecology Consultant	More than 15 years	Specialized hospital (tertiary)	21-30	Agree	Agree	Agree	Agree	Neutral	Agree	Neutral	Attention to any of the following specific features e.g. irregular wall, number of cysts, septation, solid areas, papillation or echogenecity, Presence of ascites, Results of tumor marker CA-125, Other tumor marker, Risk of malignancy index (RMI), MRI magnetic resonance imaging, Other considerations: general medical health and suitability for surgery	Some of them		RMI I [U=0 if no abnormality detected, U=1 if one abnormality seen, and U=3 if >1 abnormality seen, for postmenopausal M=3]	Some of them	Depend in the facilities we have in our hospital and patient fitness to surgery	Some of them	No
2022-05-24 21:49:57	Male	Tabouk	Specialist	11-15 years	Secondary hospital (150 beds or more)	21-30	Neutral	Strongly agree	Strongly agree	Agree	Strongly agree	Neutral	Neutral	Overall ultrasound morphology of the ovary, Ovarian diameter and size, Attention to any of the following specific features e.g. irregular wall, number of cysts, septation, solid areas, papillation or echogenecity, Presence of ascites, Results of tumor marker CA-125, Risk of malignancy index (RMI), MRI magnetic resonance imaging, Other considerations: general medical health and suitability for sur…	Some of them			Yes		No	Yes	Iota
2022-06-22 22:23:33	Female	Riyadh	Specialist	2-5 years	Specialized hospital (tertiary)	10-20	Strongly agree	Agree	Agree	Strongly agree	Strongly agree	Neutral	Strongly agree	Overall ultrasound morphology of the ovary, Ovarian diameter and size, Attention to any of the following specific features e.g. irregular wall, number of cysts, septation, solid areas, papillation or echogenecity, Presence of doppler signal in abnormal area, Presence of ascites, Results of tumor marker CA-125, Other tumor marker, MRI magnetic resonance imaging, Other considerations: general medic…	No			Yes		Some of them	No
2022-06-23 09:09:47	Female	Riyadh	Specialist	2-5 years	Specialized hospital (tertiary)	10-20	Disagree	Agree	Strongly agree	Agree	Neutral	Neutral	Neutral	Overall ultrasound morphology of the ovary, Results of tumor marker CA-125, Risk of malignancy index (RMI), MRI magnetic resonance imaging, CT computed tomography	Some of them			Some of them		No	No
2022-06-23 19:41:13	Female	Riyadh	Gynecology Consultant	More than 15 years	Specialized hospital (tertiary)	10-20	Strongly agree	Strongly agree	Strongly agree	Neutral	Agree	Strongly agree	Strongly agree	Overall ultrasound morphology of the ovary, Ovarian diameter and size, Attention to any of the following specific features e.g. irregular wall, number of cysts, septation, solid areas, papillation or echogenecity, Presence of abnormal morphology on both sides, Presence of doppler signal in abnormal area, Presence of ascites, Risk of malignancy index (RMI), ADNEX model, MRI magnetic resonance imag…	Yes		RMI I [U=0 if no abnormality detected, U=1 if one abnormality seen, and U=3 if >1 abnormality seen, for postmenopausal M=3]	Yes		Yes	No
2022-06-23 21:17:15	Female	Riyadh	Gynecology Consultant	More than 15 years	Specialized hospital (tertiary)	10-20	Strongly agree	Strongly agree	Strongly agree	Agree	Neutral	Neutral	Neutral	Overall ultrasound morphology of the ovary, Ovarian diameter and size, MRI magnetic resonance imaging	Some of them			Some of them		Yes	Yes
2022-08-23 19:37:57	Female	Makkah	Gynecology Consultant	11-15 years	Specialized hospital (tertiary)	21-30	Strongly agree	Neutral	Agree	Agree	Agree	Agree	Agree	Overall ultrasound morphology of the ovary, Ovarian diameter and size, Presence of ascites, Results of tumor marker CA-125, MRI magnetic resonance imaging	Some of them		RMI II [U=1 if no or 1 abnormality seen, U=4 if >2 abnormality detected, for postmenopausal M=4]	Yes		No	Yes
2022-08-24 01:38:45	Female	Makkah	Gynecology Consultant	More than 15 years	Secondary hospital (150 beds or more)	10-20	Agree	Agree	Agree	Agree	Neutral	Agree	Agree	Overall ultrasound morphology of the ovary, Ovarian diameter and size, Attention to any of the following specific features e.g. irregular wall, number of cysts, septation, solid areas, papillation or echogenecity, Presence of ascites, Results of tumor marker CA-125, Other tumor marker, Risk of malignancy index (RMI), MRI magnetic resonance imaging, CT computed tomography	No	I donot know how	RMI II [U=1 if no or 1 abnormality seen, U=4 if >2 abnormality detected, for postmenopausal M=4]	Yes	The grade of the tumer andstaging mangment	Yes	Yes	MRI metastasis
2022-08-24 08:42:00	Female	Makkah	Specialist	More than 15 years	Teaching and Research Hospital	31-40	Agree	I scan the patient myself	Strongly agree	Agree	Agree	Agree	Agree	Ovarian diameter and size, Attention to any of the following specific features e.g. irregular wall, number of cysts, septation, solid areas, papillation or echogenecity, Presence of abnormal morphology on both sides, Presence of doppler signal in abnormal area, Presence of ascites, Other tumor marker, ADNEX model, MRI magnetic resonance imaging, CT computed tomography	Some of them		RMI I [U=0 if no abnormality detected, U=1 if one abnormality seen, and U=3 if >1 abnormality seen, for postmenopausal M=3]	Some of them		Some of them	Sometimes
2022-12-29 12:54:05	Male	Makkah	Gynecology Consultant	More than 15 years	Specialized hospital (tertiary)	less than 10	Strongly agree	Neutral	Agree	Neutral	Neutral	Neutral	Disagree	Ovarian diameter and size, Attention to any of the following specific features e.g. irregular wall, number of cysts, septation, solid areas, papillation or echogenecity, Presence of abnormal morphology on both sides, Presence of doppler signal in abnormal area, Presence of ascites, Results of tumor marker CA-125, Other tumor marker, MRI magnetic resonance imaging, CT computed tomography	No	I do not do the gyne scans myself nor report them	Not applicable	Not applicable	I do not do the gyne scans myself nor report them	No	No	N/A
2023-01-01 22:51:01	Male	Riyadh	Gyne oncology consultant	More than 15 years	Teaching and Research Hospital	31-40	Neutral	Strongly agree	Strongly agree	Strongly agree	Strongly agree	Strongly agree	Strongly agree	Attention to any of the following specific features e.g. irregular wall, number of cysts, septation, solid areas, papillation or echogenecity, Presence of abnormal morphology on both sides, Presence of doppler signal in abnormal area, Presence of ascites, Results of tumor marker CA-125, Other tumor marker, Risk of malignancy index (RMI), ADNEX model, MRI magnetic resonance imaging, CT computed to…	Yes		RMI II [U=1 if no or 1 abnormality seen, U=4 if >2 abnormality detected, for postmenopausal M=4]	No		Yes	Yes
2023-01-04 16:21:23	Female	Riyadh	Gynecology Consultant	More than 15 years	Secondary hospital (150 beds or more)	21-30	Agree	Agree	Agree	Agree	Agree	Agree	Agree	MRI magnetic resonance imaging, CT computed tomography	Yes		Not applicable	Yes		Some of them	Yes
2023-01-04 16:34:14	Male	Makkah	Specialist	6-10 years	Secondary hospital (150 beds or more)	10-20	Neutral	Agree	Agree	Agree	Agree	Agree	Agree	Attention to any of the following specific features e.g. irregular wall, number of cysts, septation, solid areas, papillation or echogenecity, Presence of ascites, MRI magnetic resonance imaging, CT computed tomography	Some of them		Not applicable	Yes		Some of them	Sometimes
2023-01-09 14:38:14	Female	Riyadh	Gynecology Consultant	11-15 years	Specialized hospital (tertiary)	10-20	Agree	Strongly agree	Neutral	Strongly agree	Strongly disagree	Not applicable	Neutral	Overall ultrasound morphology of the ovary, Ovarian diameter and size, Attention to any of the following specific features e.g. irregular wall, number of cysts, septation, solid areas, papillation or echogenecity, Presence of abnormal morphology on both sides, Presence of doppler signal in abnormal area, Presence of ascites, Results of tumor marker CA-125, Other tumor marker, Risk of malignancy i…	Yes		RMI I [U=0 if no abnormality detected, U=1 if one abnormality seen, and U=3 if >1 abnormality seen, for postmenopausal M=3]	Some of them		No	No
2023-01-10 13:51:59	Female	Riyadh	Specialist	11-15 years	Teaching and Research Hospital	10-20	Agree	I scan the patient myself	Agree	Agree	Strongly agree	Agree	Agree	Overall ultrasound morphology of the ovary	No	Sometimes not all patients have CA 125		Not applicable		Some of them	Rarely	IOTA
2023-01-10 18:43:49	Female	Riyadh	Gynecology Consultant	11-15 years	Specialized hospital (tertiary)	31-40	Neutral	Strongly agree	Strongly agree	Strongly agree	Disagree	Neutral	Neutral	Overall ultrasound morphology of the ovary, Ovarian diameter and size, Attention to any of the following specific features e.g. irregular wall, number of cysts, septation, solid areas, papillation or echogenecity, Presence of ascites, Results of tumor marker CA-125, Other tumor marker, Risk of malignancy index (RMI), MRI magnetic resonance imaging, CT computed tomography, Other considerations: ge…	Some of them		RMI I [U=0 if no abnormality detected, U=1 if one abnormality seen, and U=3 if >1 abnormality seen, for postmenopausal M=3]	Yes		No	Yes	RMI
2023-01-25 14:54:28	Female	Riyadh	Specialist	6-10 years	Secondary hospital (150 beds or more)	31-40	Neutral	Strongly agree	Agree	Strongly agree	Disagree	Neutral	Disagree	Overall ultrasound morphology of the ovary, Ovarian diameter and size, Attention to any of the following specific features e.g. irregular wall, number of cysts, septation, solid areas, papillation or echogenecity, Presence of abnormal morphology on both sides, Presence of doppler signal in abnormal area, Presence of ascites, Results of tumor marker CA-125, Risk of malignancy index (RMI), Other co…	Yes		RMI I [U=0 if no abnormality detected, U=1 if one abnormality seen, and U=3 if >1 abnormality seen, for postmenopausal M=3]	Some of them	Need over all assessment	No	No
2023-01-25 19:07:51	Female	Riyadh	Specialist	11-15 years	Teaching and Research Hospital	31-40	Agree	Agree	Strongly agree	Strongly agree	Agree	Neutral	Neutral	Attention to any of the following specific features e.g. irregular wall, number of cysts, septation, solid areas, papillation or echogenecity, Presence of ascites, Results of tumor marker CA-125, Other tumor marker, Risk of malignancy index (RMI), CT computed tomography, Other considerations: general medical health and suitability for surgery, Patient wishes	Yes		RMI I [U=0 if no abnormality detected, U=1 if one abnormality seen, and U=3 if >1 abnormality seen, for postmenopausal M=3]	Yes		No	No	RMI
2023-01-25 20:43:56	Female	Riyadh	Specialist	6-10 years	Secondary hospital (150 beds or more)	31-40	Neutral	Agree	Agree	Agree	Disagree	Agree	Agree	Overall ultrasound morphology of the ovary, Ovarian diameter and size, Attention to any of the following specific features e.g. irregular wall, number of cysts, septation, solid areas, papillation or echogenecity, Presence of abnormal morphology on both sides, Presence of doppler signal in abnormal area, Presence of ascites, Results of tumor marker CA-125, Other tumor marker, Risk of malignancy i…	Yes		RMI I [U=0 if no abnormality detected, U=1 if one abnormality seen, and U=3 if >1 abnormality seen, for postmenopausal M=3]	Yes		Yes	Yes
2023-01-25 21:24:53	Female	Madinah	Specialist	2-5 years	Secondary hospital (150 beds or more)	31-40	Neutral	Agree	Agree	Agree	Disagree	Neutral	Neutral	Ovarian diameter and size, Attention to any of the following specific features e.g. irregular wall, number of cysts, septation, solid areas, papillation or echogenecity, Presence of doppler signal in abnormal area, Presence of ascites, Results of tumor marker CA-125, Other tumor marker, ADNEX model, MRI magnetic resonance imaging, CT computed tomography	No					No	No
2023-01-26 15:51:40	Female	Qassim	Specialist	More than 15 years	Teaching and Research Hospital	31-40	Agree	Agree	Agree	Neutral	Agree	Agree	Neutral	Overall ultrasound morphology of the ovary, Ovarian diameter and size, Attention to any of the following specific features e.g. irregular wall, number of cysts, septation, solid areas, papillation or echogenecity, Presence of abnormal morphology on both sides, Presence of doppler signal in abnormal area, Presence of ascites, Results of tumor marker CA-125, Other tumor marker, Risk of malignancy i…	No	Not done before	Not applicable	Some of them	Different clinical picture	No	Sometimes	Pelvic mass score
2023-01-30 09:37:15	Male	Qassim	Gynecology Consultant	More than 15 years	Secondary hospital (150 beds or more)	21-30	Agree	Agree	Agree	Agree	Disagree	Agree	Agree	ADNEX model	Yes		RMI I [U=0 if no abnormality detected, U=1 if one abnormality seen, and U=3 if >1 abnormality seen, for postmenopausal M=3]	Yes		No	Sometimes
2023-02-01 06:57:28	Male	Qassim	Specialist	11-15 years	Secondary hospital (150 beds or more)	31-40	Agree	Agree	Neutral	Agree	Neutral	Neutral	Agree	Overall ultrasound morphology of the ovary, Ovarian diameter and size, Attention to any of the following specific features e.g. irregular wall, number of cysts, septation, solid areas, papillation or echogenecity, Presence of abnormal morphology on both sides, Presence of doppler signal in abnormal area, Presence of ascites, Results of tumor marker CA-125, Other tumor marker, Risk of malignancy i…	No	No oncology in our unit		Some of them	There are another factors	No	Rarely	No oncology in the unit
2023-03-16 00:10:35	Female	Makkah	Gynecology Consultant	More than 15 years	Secondary hospital (150 beds or more)	31-40	Agree	Strongly agree	Strongly agree	Agree	Neutral	Neutral	Strongly agree	Ovarian diameter and size, Attention to any of the following specific features e.g. irregular wall, number of cysts, septation, solid areas, papillation or echogenecity, Presence of abnormal morphology on both sides, Presence of doppler signal in abnormal area, Presence of ascites, Results of tumor marker CA-125, Other tumor marker, Risk of malignancy index (RMI), MRI magnetic resonance imaging	Yes			Some of them		Some of them	Sometimes
2023-03-16 06:22:58	Female	Makkah	Gynecology Consultant	More than 15 years	Secondary hospital (150 beds or more)	less than 10	Strongly agree	Neutral	Agree	Neutral	Disagree	Agree	Neutral	Overall ultrasound morphology of the ovary, Ovarian diameter and size, Attention to any of the following specific features e.g. irregular wall, number of cysts, septation, solid areas, papillation or echogenecity, Presence of abnormal morphology on both sides, Presence of ascites, Results of tumor marker CA-125, Other tumor marker, Risk of malignancy index (RMI), MRI magnetic resonance imaging, O…	Yes		RMI I [U=0 if no abnormality detected, U=1 if one abnormality seen, and U=3 if >1 abnormality seen, for postmenopausal M=3]	Yes	Staging	Some of them	Yes	Staging old use
2023-04-22 03:11:07	Female	Makkah	Gynecology Consultant	2-5 years	Specialized hospital (tertiary)	31-40	Strongly agree	Strongly agree	Agree	Agree	Neutral	Neutral	Neutral	Attention to any of the following specific features e.g. irregular wall, number of cysts, septation, solid areas, papillation or echogenecity, Presence of abnormal morphology on both sides, Presence of ascites, Risk of malignancy index (RMI), MRI magnetic resonance imaging, CT computed tomography, Other considerations: general medical health and suitability for surgery, Patient wishes	Yes		Not applicable	Not applicable		Some of them	Yes	Ct
